# Supplementary material for: Proton-coupled electron transfer at a mis-metalated zinc site detected with protein charge ladders
Source: Royal Society of Chemistry journal article supplement (doi:10.1039/d4cp01989j), 2024-01-01
Supplement: d4cp01989j1.pdf [file d4cp01989j1.pdf]

## Supporting Information

# Proton-coupled electron transfer at a mis-metalated zinc site detected with protein charge ladders.

Mayte Gonzalez, Matthew J. Guberman-Pfeffer, Jordan C. Koone, Chad M. Dashnaw, Travis J. Lato, Bryan F. Shaw\*

Department of Chemistry and Biochemistry, Baylor University, Waco, TX

\*To whom correspondence should be addressed: [bryan\\_shaw@baylor.edu](mailto:bryan_shaw@baylor.edu)

**Key Words:** PCET, superoxide dismutase 1, charge regulation, net charge, copper

**Table S1.** Metal equivalents of copper per dimeric SOD1, as determined via ICP-MS. Fewer than 0.1 equivalents of metal present per dimer classified protein as “metal free”. All experiments were performed in excess copper. The buffer used for capillary electrophoresis was also tested for copper.

| pH  | Zn: apo WT SOD1 dimer | Cu: apo WT SOD1 dimer | Cu: WT metallated SOD1 dimer | Buffer |
|-----|-----------------------|-----------------------|------------------------------|--------|
| 5.6 | 0.01                  | 0.04                  | 4.74                         | -0.03  |
| 7.4 | -0.05                 | 0.02                  | 4.94                         | -0.10  |
| 8.3 | 0.01                  | 0.04                  | 4.76                         | 0.02   |

**Table S2. Computed pK<sub>a</sub>s before and after reducing the Cu ion in the canonical Zn-binding site of SOD1.**

| Residue ID | Residue Name | Subunit #1         |                     |                             | Subunit #2         |                     |                             |
|------------|--------------|--------------------|---------------------|-----------------------------|--------------------|---------------------|-----------------------------|
|            |              | pK <sub>a,ox</sub> | pK <sub>a,red</sub> | ΔpK <sub>a,(red.-ox.)</sub> | pK <sub>a,ox</sub> | pK <sub>a,red</sub> | ΔpK <sub>a,(red.-ox.)</sub> |
| 3          | Lys          | 11.7               | 11.0                | -0.7                        | 11.6               | 11.5                | -0.1                        |
| 9          | Lys          | 9.4                | 9.4                 | 0.0                         | 9.5                | 9.4                 | -0.1                        |
| 11         | Asp          | 3.8                | 3.9                 | 0.0                         | 3.8                | 3.8                 | 0.0                         |
| 21         | Glu          | 4.7                | 4.7                 | 0.0                         | 4.6                | 4.3                 | -0.3                        |
| 23         | Lys          | 10.2               | 10.3                | 0.1                         | 10.2               | 10.3                | 0.1                         |
| 24         | Glu          | 4.6                | 4.6                 | 0.0                         | 4.5                | 4.6                 | 0.1                         |
| 30         | Lys          | 10.3               | 10.3                | 0.1                         | 10.4               | 10.3                | -0.1                        |
| 36         | Lys          | 9.9                | 9.8                 | -0.1                        | 10.0               | 9.9                 | -0.1                        |
| 40         | Glu          | 3.9                | 3.9                 | 0.0                         | 3.6                | 4.4                 | 0.9                         |
| 43         | His          | 11.0               | 11.5                | 0.5                         | 11.4               | 11.4                | 0.0                         |
| 49         | Glu          | 5.1                | 5.3                 | 0.2                         | 5.1                | 5.2                 | 0.1                         |
| 52         | Asp          | 1.5                | 1.5                 | 0.0                         | 1.4                | 1.4                 | -0.1                        |
| 70         | Lys          | 10.5               | 10.1                | -0.4                        | 9.9                | 10.2                | 0.3                         |
| 75         | Lys          | 10.5               | 10.5                | 0.0                         | 10.4               | 10.5                | 0.0                         |
| 76         | Asp          | 3.3                | 3.3                 | 0.0                         | 3.3                | 3.4                 | 0.2                         |
| 77         | Glu          | 4.5                | 4.4                 | -0.1                        | 4.4                | 4.4                 | 0.0                         |
| 78         | Glu          | 3.7                | 3.7                 | 0.0                         | 3.8                | 3.9                 | 0.0                         |
| 90         | Asp          | 3.0                | 3.1                 | 0.2                         | 2.7                | 3.1                 | 0.4                         |
| 91         | Lys          | 10.9               | 10.9                | 0.0                         | 10.9               | 10.8                | 0.0                         |
| 92         | Asp          | 5.1                | 5.4                 | 0.3                         | 4.9                | 5.2                 | 0.2                         |
| 96         | Asp          | 4.3                | 4.6                 | 0.3                         | 4.6                | 4.4                 | -0.2                        |
| 100        | Glu          | 4.0                | 4.2                 | 0.2                         | 4.3                | 4.3                 | 0.0                         |
| 101        | Asp          | -1.8               | -2.4                | -0.7                        | -3.0               | -1.6                | 1.4                         |
| 109        | Asp          | 3.4                | 3.4                 | 0.0                         | 3.3                | 3.6                 | 0.3                         |
| 110        | His          | 7.1                | 6.7                 | -0.3                        | 6.9                | 7.0                 | 0.2                         |
| 121        | Glu          | 3.7                | 3.9                 | 0.2                         | 3.7                | 3.8                 | 0.1                         |
| 122        | Lys          | 10.2               | 10.2                | -0.1                        | 10.2               | 10.2                | 0.1                         |
| 124        | Asp          | -1.8               | 0.8                 | 2.6                         | -2.3               | 0.6                 | 2.9                         |
| 125        | Asp          | 2.5                | 3.5                 | 1.0                         | 2.6                | 2.2                 | -0.4                        |
| 128        | Lys          | 10.5               | 10.7                | 0.2                         | 10.6               | 10.7                | 0.1                         |
| 132        | Glu          | 3.6                | 3.8                 | 0.2                         | 3.8                | 3.9                 | 0.0                         |
| 133        | Glu          | 4.6                | 4.6                 | 0.0                         | 4.7                | 4.9                 | 0.2                         |
| 136        | Lys          | 10.3               | 10.3                | 0.0                         | 10.3               | 10.3                | 0.0                         |

**Table S3.** Summary of classical molecular dynamics simulation conditions and timescales.

| Redox State                       | Zn-Site Bonded Ligands                  | Zn-Site Non-Bonded Ligands                                  | Simulated pH                     | Simulated Time (ns) |
|-----------------------------------|-----------------------------------------|-------------------------------------------------------------|----------------------------------|---------------------|
| Cu <sup>+1</sup> Cu <sup>+2</sup> | His-63,<br>His-71,<br>His-80,<br>Asp-83 |                                                             | -4, -2, 0, 2,<br>4, 6, 8, 10, 12 | 24 ns at each pH    |
| Cu <sup>+1</sup> Cu <sup>+1</sup> | His-63,<br>His-71,<br>His-80,<br>Asp-83 |                                                             | -4, -2, 0, 2,<br>4, 6, 8, 10, 12 | 24 ns at each pH    |
| Cu <sup>+1</sup> Cu <sup>+1</sup> | His-71,<br>His-80,<br>Asp-83            | His-63<br>(N <sub>ε</sub> protonated)                       |                                  | 314                 |
| Cu <sup>+1</sup> Cu <sup>+1</sup> | His-71,<br>His-80,<br>Asp-83            | His-63<br>(N <sub>ε</sub> and N <sub>δ</sub><br>protonated) |                                  | 313                 |
| Cu <sup>+1</sup> Cu <sup>+1</sup> | His-63,<br>His-80,<br>Asp-83            | His-71<br>(N <sub>ε</sub> protonated)                       |                                  | 308                 |
| Cu <sup>+1</sup> Cu <sup>+1</sup> | His-63,<br>His-80,<br>Asp-83            | His-71<br>(N <sub>ε</sub> and N <sub>δ</sub><br>protonated) |                                  | 291                 |
| Cu <sup>+1</sup> Cu <sup>+1</sup> | His-63,<br>His-71,<br>Asp-83            | His-80<br>(N <sub>ε</sub> protonated)                       |                                  | 292                 |
| Cu <sup>+1</sup> Cu <sup>+1</sup> | His-63,<br>His-71,<br>Asp-83            | His-80<br>(N <sub>ε</sub> and N <sub>δ</sub><br>protonated) |                                  | 382                 |
| Cu <sup>+1</sup> Cu <sup>+1</sup> | His-63,<br>His-71,<br>His-80            | Asp-83<br>(unprotonated)                                    |                                  | 300                 |
| Cu <sup>+1</sup> Cu <sup>+1</sup> | His-63,<br>His-71,<br>His-80            | Asp-83<br>(protonated)                                      |                                  | 331                 |
